# Supplementary material for: Performance characterization of transparent and conductive grids one-step-printed on curved substrates using template-guided foaming
Source: Royal Society of Chemistry journal article supplement (doi:10.1039/d2ra05551a), 2022-01-01
Supplement: d2ra05551a1.pdf [file d2ra05551a1.pdf]

*Supporting Information*

# Performance Characterization of Transparent and Conductive Grids One-Step-Printed on Curved Substrates Using Template-Guided Foaming

Youngchul Chae<sup>1</sup>, Juyeol Bae<sup>1</sup>, Kyoungyoung Lim<sup>1</sup>, and Taesung Kim<sup>1\*</sup>

<sup>1</sup>Department of Mechanical Engineering, Ulsan National Institute of Science and Technology

(UNIST), 50 UNIST-gil, Ulsan 44919, Republic of Korea

**\*CORRESPONDING AUTHOR:**

Taesung Kim  
Department of Mechanical Engineering  
Ulsan National Institute of Science and Technology (UNIST)  
50 UNIST-gil, Ulsan 44919, Republic of Korea  
E-mail: [tskim@unist.ac.kr](mailto:tskim@unist.ac.kr)  
Tel: +82-52-217-2313  
Fax: +82-52-217-2409

## Supporting Figure

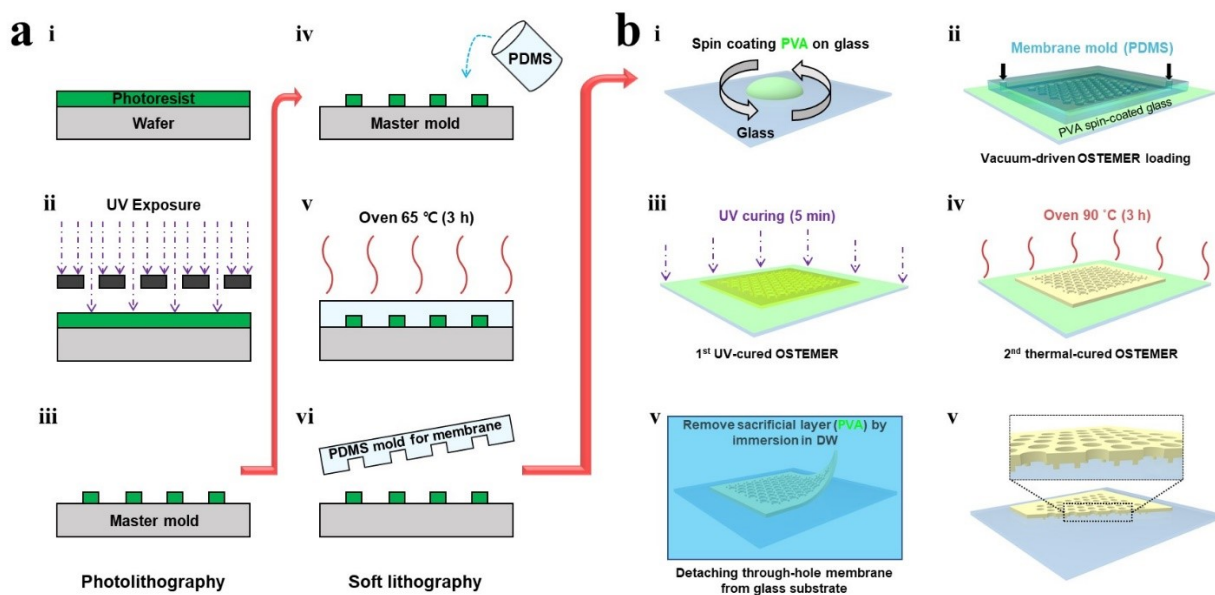

**Figure S1. Fabrication process of the conductive grids using the TGF method. (a)** Schematic of photolithography used for fabricating an SU-8 master mold and soft lithography used for fabricating a PDMS mold. **(b)** Schematic of the fabrication of OSTEMER membranes with through-hole and post arrays using the PDMS mold.

- END
